# Supplementary material for: Antitumor activity of a small-molecule inhibitor of the histone kinase Haspin
Source: PubMed Central journal article supplement — Oncogene. 2011 Aug 1;31(11):1408–18. doi: 10.1038/onc.2011.335 (PMC3312407; doi:10.1038/onc.2011.335), 2011-08-01
Supplement: onc2011335x1.pdf [file onc2011335x1.pdf]

## Supplemental Material

**Supplementary Table 1.** Analysis of the enzymatic inhibitory capacity of CHR-6494 in a panel of twenty-seven protein kinases using a Fluorescence Resonance Energy Transfer (FRET)-assay based on the differential sensitivity of phosphorylated and non-phosphorylated peptides to protein cleavage (Z'-LYTE Kinase Assay, Invitrogen).

| Kinase                  | % inhibition at 0.1 $\mu$ M |
|-------------------------|-----------------------------|
| DAPK1                   | 0                           |
| MAPK1 (ERK2)            | 0                           |
| MAPK14 (p38 $\alpha$ )  | 0                           |
| PLK1                    | 0                           |
| TEK (Tie2)              | 0                           |
| EPHB4                   | 1                           |
| DAPK3 (ZIPK)            | 3                           |
| IKBKB (IKK $\beta$ )    | 3                           |
| AURKB (Aurora B)        | 4                           |
| MAP2K1 (MEK1)           | 5                           |
| CHEK2 (CHK2)            | 8                           |
| SYK                     | 9                           |
| MAPK9 (JNK2)            | 10                          |
| MAPK8 (JNK1)            | 12                          |
| MET (cMet)              | 2                           |
| CHEK1 (CHK1)            | 14                          |
| ALK                     | 15                          |
| FLT1 (VEGFR1)           | 17                          |
| KDR (VEGFR2)            | 18                          |
| LCK                     | 18                          |
| PDGFRB (PDGFR $\beta$ ) | 27                          |
| SRC                     | 31                          |
| CDK2/cyclin A           | 33                          |
| CDK1/cyclin B           | 34                          |
| PIM1                    | 36                          |
| GSK3B (GSK3 $\beta$ )   | 48                          |
| NTRK1 (TRKA)            | 58                          |

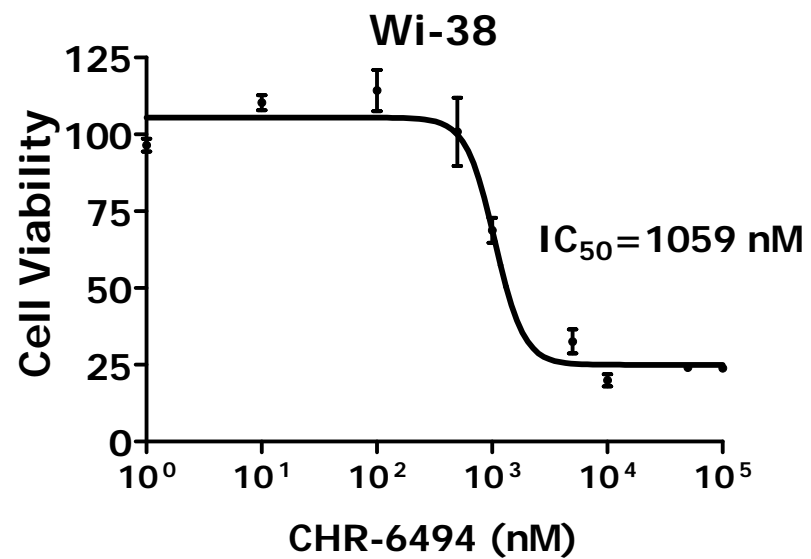

**Supplementary Figure 1.**

Effect of CHR-6494 in cell viability determined by the XTT assay in Wi-38 cells.

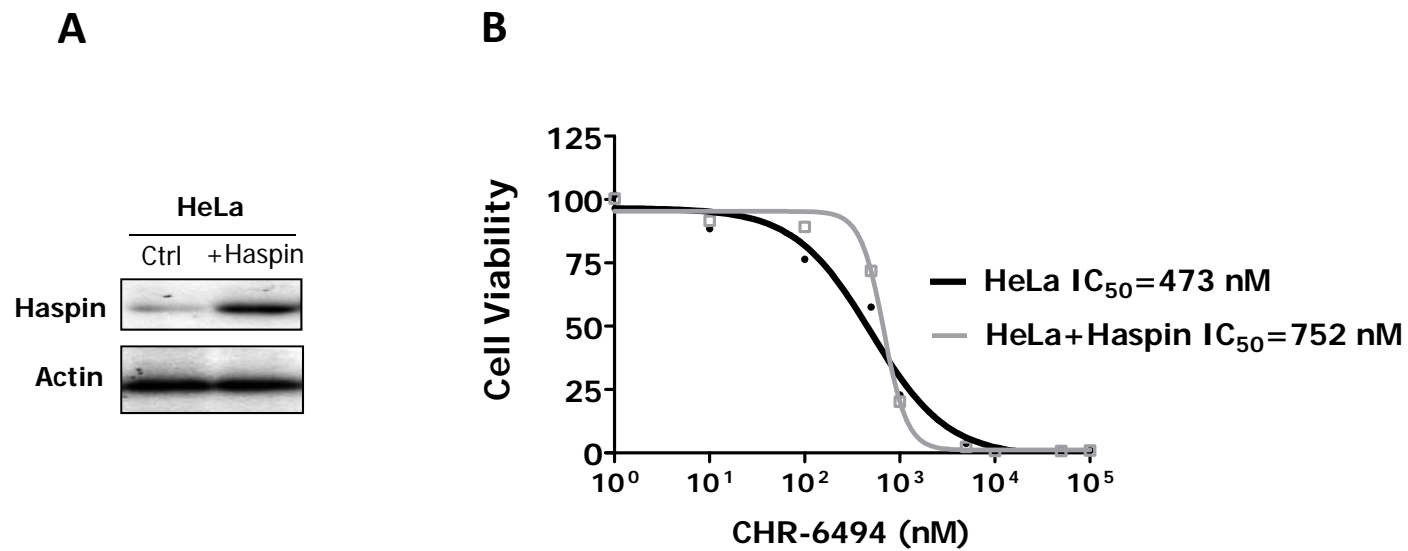

**Supplementary Figure 2.**

Haspin overexpression in HeLa cells increases the  $IC_{50}$  value upon CHR-6494 use. A, western-blot of Haspin upon transfection. B, Effect of Haspin overexpression in cell viability determined by the XTT assay.
